# Supplementary material
Source: MDPI journal article supplement (https://www.mdpi.com/2379-139X/10/1/14)
Supplement: s1 [file s1]

**Table S1: Sensitivity analysis investigating the effect of large vessel exclusion on the perfusion results.**

A one-sample t-test was performed to test whether the CBF ratios between CGM and WM were significantly different, after 0%, 10%, 20%, 30%, 40% or 50% of the largest vessels were excluded from the analysis. The results are shown below ( $P < 0.05$  was assumed to be significant).

0% largest vessel exclusion

| CBF in            | CGM          |         | WM           |         |
|-------------------|--------------|---------|--------------|---------|
|                   | Std. $\beta$ | P-value | Std. $\beta$ | P-value |
| Control variables |              |         |              |         |
| Age               | -0.299       | 0.042*  | -0.114       | 0.457   |
| Sex               | 0.417        | 0.006*  | 0.348        | 0.028*  |

10% largest vessel exclusion

| CBF in            | CGM          |         | WM           |         |
|-------------------|--------------|---------|--------------|---------|
|                   | Std. $\beta$ | P-value | Std. $\beta$ | P-value |
| Control variables |              |         |              |         |
| Age               | -0.304       | 0.037*  | -0.151       | 0.321   |
| Sex               | 0.428        | 0.004*  | 0.366        | 0.020*  |

20% largest vessel exclusion

| CBF in            | CGM          |         | WM           |         |
|-------------------|--------------|---------|--------------|---------|
|                   | Std. $\beta$ | P-value | Std. $\beta$ | P-value |
| Control variables |              |         |              |         |
| Age               | -0.308       | 0.033*  | -0.167       | 0.266   |
| Sex               | 0.448        | 0.003*  | 0.395        | 0.011*  |

30% largest vessel exclusion

| CBF in            | CGM          |         | WM           |         |
|-------------------|--------------|---------|--------------|---------|
|                   | Std. $\beta$ | P-value | Std. $\beta$ | P-value |
| Control variables |              |         |              |         |
| Age               | -0.322       | 0.024*  | -0.177       | 0.233   |
| Sex               | 0.461        | 0.002*  | 0.424        | 0.006*  |

40% largest vessel exclusion

| <b>CBF in</b>            | <b>CGM</b>                     |                | <b>WM</b>                      |                |
|--------------------------|--------------------------------|----------------|--------------------------------|----------------|
| <b>Control variables</b> | <b>Std. <math>\beta</math></b> | <b>P-value</b> | <b>Std. <math>\beta</math></b> | <b>P-value</b> |
| <b>Age</b>               | -0.331                         | 0.019*         | -0.194                         | 0.184          |
| <b>Sex</b>               | 0.479                          | 0.001*         | 0.445                          | 0.004*         |

50% largest vessel exclusion

| <b>CBF in</b>            | <b>CGM</b>                     |                | <b>WM</b>                      |                |
|--------------------------|--------------------------------|----------------|--------------------------------|----------------|
| <b>Control variables</b> | <b>Std. <math>\beta</math></b> | <b>P-value</b> | <b>Std. <math>\beta</math></b> | <b>P-value</b> |
| <b>Age</b>               | -0.355                         | 0.012*         | -0.215                         | 0.134          |
| <b>Sex</b>               | 0.474                          | 0.001*         | 0.479                          | 0.002*         |
